# Supplementary material for: Transferability and Fine Mapping of genome-wide associated loci for lipids in African Americans
Source: PubMed Central journal article supplement (PMC3573912; doi:10.1186/1471-2350-13-88), 2012-09-21
Supplement: 1471-2350-13-88-S1.pdf [file 1471-2350-13-88-S1.pdf]

**Additional File 1.** Allele Frequency Comparison for Tested Loci that were not Transferable

| SNP                                                           | Chr | Risk/Reference Alleles <sup>1</sup> | <u>Risk Allele Frequency</u>   |                                |
|---------------------------------------------------------------|-----|-------------------------------------|--------------------------------|--------------------------------|
|                                                               |     |                                     | European Ancestry <sup>2</sup> | African Americans <sup>3</sup> |
| <u>Comparable Allele Frequencies (n=20)</u>                   |     |                                     |                                |                                |
| rs1689800                                                     | 1   | G/A                                 | 0.35                           | 0.32                           |
| rs2479409                                                     | 1   | G/A                                 | 0.3                            | 0.27                           |
| rs645040                                                      | 3   | G/T                                 | 0.22                           | 0.30                           |
| rs442177                                                      | 4   | G/T                                 | 0.41                           | 0.47                           |
| rs6450176                                                     | 5   | A/G                                 | 0.26                           | 0.30                           |
| rs1564348                                                     | 6   | C/T                                 | 0.17                           | 0.11                           |
| rs3177928                                                     | 6   | A/G                                 | 0.16                           | 0.08                           |
| rs17145738                                                    | 7   | T/C                                 | 0.12                           | 0.09                           |
| rs10761731                                                    | 10  | T/A                                 | 0.43                           | 0.39                           |
| rs3136441                                                     | 11  | C/T                                 | 0.15                           | 0.21                           |
| rs964184                                                      | 11  | G/C                                 | 0.13                           | 0.19                           |
| rs4759375                                                     | 12  | T/C                                 | 0.06                           | 0.09                           |
| rs4765127                                                     | 12  | T/G                                 | 0.34                           | 0.35                           |
| rs2412710                                                     | 15  | A/G                                 | 0.02                           | 0.06                           |
| rs2652834                                                     | 15  | A/G                                 | 0.2                            | 0.29                           |
| rs16942887                                                    | 16  | A/G                                 | 0.12                           | 0.20                           |
| rs12967135                                                    | 18  | A/G                                 | 0.23                           | 0.29                           |
| rs492602                                                      | 19  | G/A                                 | 0.49                           | 0.49                           |
| rs2277862                                                     | 20  | T/C                                 | 0.15                           | 0.17                           |
| <u>Frequency considerably higher in AA<sup>4</sup> (n=12)</u> |     |                                     |                                |                                |
| rs4846914                                                     | 1   | G/A                                 | 0.4                            | 0.86                           |
| rs10195252                                                    | 2   | C/T                                 | 0.4                            | 0.74                           |
| rs6882076                                                     | 5   | T/C                                 | 0.35                           | 0.63                           |
| rs2814944                                                     | 6   | A/G                                 | 0.16                           | 0.32                           |
| rs605066                                                      | 6   | C/T                                 | 0.42                           | 0.56                           |
| rs11776767                                                    | 8   | C/G                                 | 0.37                           | 0.67                           |
| rs1495741                                                     | 8   | G/A                                 | 0.22                           | 0.38                           |
| rs10128711                                                    | 11  | T/C                                 | 0.28                           | 0.8                            |
| rs2923084                                                     | 11  | G/A                                 | 0.17                           | 0.48                           |
| rs838880                                                      | 12  | C/T                                 | 0.31                           | 0.68                           |
| rs2929282                                                     | 15  | T/A                                 | 0.05                           | 0.33                           |
| rs6029526                                                     | 20  | A/T                                 | 0.47                           | 0.79                           |
| <u>Frequency considerably lower in AA<sup>4</sup> (n=12)</u>  |     |                                     |                                |                                |
| rs2642442                                                     | 1   | C/T                                 | 0.32                           | 0.21                           |
| rs4660293                                                     | 1   | G/A                                 | 0.23                           | 0.05                           |
| rs7515577                                                     | 1   | C/A                                 | 0.21                           | 0.06                           |
| rs12916                                                       | 5   | C/T                                 | 0.39                           | 0.25                           |

|            |    |     |      |      |
|------------|----|-----|------|------|
| rs4731702  | 7  | T/C | 0.48 | 0.28 |
| rs2293889  | 8  | T/G | 0.41 | 0.13 |
| rs174546   | 11 | T/C | 0.34 | 0.09 |
| rs11613352 | 12 | T/C | 0.23 | 0.11 |
| rs1169288  | 12 | C/A | 0.33 | 0.07 |
| rs7134594  | 12 | C/T | 0.47 | 0.26 |
| rs11649653 | 16 | G/C | 0.4  | 0.08 |
| rs7255436  | 19 | C/A | 0.47 | 0.29 |

---

<sup>1</sup> As listed in the European Ancestry Meta-analysis

<sup>2</sup> From the European Ancestry Meta-Analysis

<sup>3</sup> From HUFs. The frequency of the previously-reported risk allele is given so that frequency columns are directly comparable.

<sup>4</sup> Variants where interethnic differences in allele frequency exceeded 10%.
