# Supplementary material for: Transferability and Fine Mapping of genome-wide associated loci for lipids in African Americans
Source: PubMed Central journal article supplement (PMC3573912; doi:10.1186/1471-2350-13-88), 2012-09-21
Supplement: 1471-2350-13-88-S2.pdf [file 1471-2350-13-88-S2.pdf]

**Additional File 2.** Top SNPs for GWAS of Total Cholesterol

| SNP            | P-value  | Beta (95% CI)        | Minor Allele | MAF  | Chr | Position  | Nearest Gene         | SNP Type   | Detection Method <sup>1</sup> |
|----------------|----------|----------------------|--------------|------|-----|-----------|----------------------|------------|-------------------------------|
| chr10:63290442 | 9.11E-07 | -34.3 (-46.1, -21.5) | A            | 0.02 | 10  | 63290442  | <i>ARID5B</i>        | Upstream   | I                             |
| chr20:25533926 | 2.02E-06 | -14.7 (-20.3, -8.8)  | G            | 0.11 | 20  | 25533926  | <i>NANP</i>          | Upstream   | I                             |
| chr10:63300324 | 2.06E-06 | -38 (-51.4, -23.4)   | T            | 0.01 | 10  | 63300324  | <i>ARID5B</i>        | Upstream   | I                             |
| rs57830607     | 2.13E-06 | -14.7 (-20.3, -8.8)  | T            | 0.11 | 20  | 25515370  | <i>NANP</i>          | Downstream | I                             |
| chr8:72797070  | 2.20E-06 | -25.3 (-34.7, -15.3) | G            | 0.03 | 8   | 72797070  | <i>MSC</i>           | Upstream   | I                             |
| rs4075687      | 2.32E-06 | 10 (5.8, 14.3)       | A            | 0.41 | 5   | 30505930  | <i>RP11-136H13.2</i> | Intergenic | I                             |
| rs920279       | 2.37E-06 | 18.3 (10.6, 26.4)    | G            | 0.09 | 2   | 127628659 | <i>AC110926.2</i>    | Intergenic | I                             |
| chr20:25502711 | 2.43E-06 | -14.4 (-20, -8.6)    | A            | 0.11 | 20  | 25502711  | <i>KIAA0980</i>      | Intronic   | I                             |
| rs58516525     | 2.43E-06 | -14.4 (-20, -8.6)    | A            | 0.11 | 20  | 25505294  | <i>KIAA0980</i>      | Intronic   | I                             |
| chr20:25509161 | 2.43E-06 | -14.4 (-20, -8.6)    | A            | 0.11 | 20  | 25509161  | <i>KIAA0980</i>      | Intronic   | I                             |
| rs10271961     | 2.49E-06 | -14.1 (-19.7, -8.4)  | G            | 0.14 | 7   | 56261590  | <i>CCNJP1</i>        | Downstream | I                             |
| rs4867270      | 2.68E-06 | 9.9 (5.7, 14.2)      | C            | 0.38 | 5   | 30487171  | <i>RP11-136H13.2</i> | Intergenic | G                             |
| chr20:25532854 | 3.12E-06 | -15.4 (-21.5, -9.1)  | T            | 0.09 | 20  | 25532854  | <i>NANP</i>          | Upstream   | I                             |
| rs6867293      | 3.13E-06 | 10 (5.7, 14.3)       | T            | 0.44 | 5   | 30504885  | <i>RP11-136H13.2</i> | Intergenic | I                             |
| chr20:25563200 | 3.37E-06 | -14.1 (-19.7, -8.3)  | A            | 0.11 | 20  | 25563200  | <i>NANP</i>          | Downstream | I                             |
| rs7500836      | 3.88E-06 | 11.5 (6.6, 16.5)     | C            | 0.22 | 16  | 85509652  | <i>AC106745.1</i>    | Intergenic | I                             |
| chr20:25547693 | 3.90E-06 | -15.2 (-21.2, -8.9)  | A            | 0.09 | 20  | 25547693  | <i>NANP</i>          | Intronic   | I                             |
| rs6450780      | 4.34E-06 | 9.6 (5.5, 13.8)      | A            | 0.45 | 5   | 30503459  | <i>RP11-136H13.2</i> | Intergenic | I                             |
| rs13345276     | 4.39E-06 | 36.7 (20.3, 54.2)    | T            | 0.02 | 19  | 39251381  | <i>RPS4XP21</i>      | Intergenic | I                             |
| rs4797274      | 4.42E-06 | -25.2 (-34.9, -15)   | C            | 0.03 | 18  | 6969102   | <i>LAMA1</i>         | Intronic   | I                             |

<sup>1</sup>Whether SNP was genotyped (G) or imputed (I)
