# Supplementary material for: Transferability and Fine Mapping of genome-wide associated loci for lipids in African Americans
Source: PubMed Central journal article supplement (PMC3573912; doi:10.1186/1471-2350-13-88), 2012-09-21
Supplement: 1471-2350-13-88-S3.pdf [file 1471-2350-13-88-S3.pdf]

### Additional File 3. Top SNPs for GWAS of HDL

| SNP            | P-value  | Beta (95% CI)       | Minor Allele | MAF  | Chr | Position  | Nearest Gene        | SNP Type   | Detection Method <sup>1</sup> |
|----------------|----------|---------------------|--------------|------|-----|-----------|---------------------|------------|-------------------------------|
| rs1047163      | 6.44E-08 | -7 (-9.3, -4.6)     | C            | 0.08 | 2   | 20681293  | <i>HS1BP3</i>       | Intronic   | G                             |
| rs1897433      | 3.52E-07 | 4.8 (2.9, 6.7)      | A            | 0.24 | 2   | 134032992 | <i>NCKAP5</i>       | Intronic   | G                             |
| rs1195239      | 3.93E-07 | 6.2 (3.8, 8.8)      | T            | 0.13 | 7   | 68311814  | <i>RP11-3P22.2</i>  | Intergenic | I                             |
| rs57444374     | 4.38E-07 | -6.8 (-9.2, -4.3)   | C            | 0.08 | 2   | 20699144  | <i>HS1BP3</i>       | Intronic   | I                             |
| rs61227046     | 4.38E-07 | -6.8 (-9.2, -4.3)   | G            | 0.08 | 2   | 20700819  | <i>HS1BP3</i>       | Intronic   | I                             |
| rs72782390     | 4.41E-07 | -6.9 (-9.3, -4.4)   | A            | 0.08 | 2   | 20684949  | <i>HS1BP3</i>       | Intronic   | I                             |
| rs57347707     | 4.41E-07 | -6.8 (-9.2, -4.3)   | T            | 0.08 | 2   | 20700945  | <i>HS1BP3</i>       | Intronic   | I                             |
| rs60580455     | 4.41E-07 | -6.8 (-9.2, -4.3)   | A            | 0.08 | 2   | 20702228  | <i>HS1BP3</i>       | Intronic   | I                             |
| rs57417650     | 4.41E-07 | -6.8 (-9.2, -4.3)   | T            | 0.08 | 2   | 20704597  | <i>HS1BP3</i>       | Intronic   | I                             |
| rs10194140     | 5.26E-07 | 4.8 (2.9, 6.8)      | T            | 0.22 | 2   | 134049571 | <i>NCKAP5</i>       | Intergenic | G                             |
| rs1897434      | 5.45E-07 | 4.8 (2.9, 6.8)      | T            | 0.22 | 2   | 134033073 | <i>NCKAP5</i>       | Intronic   | I                             |
| rs11675147     | 1.02E-06 | 5.3 (3.1, 7.6)      | A            | 0.19 | 2   | 134043638 | <i>NCKAP5</i>       | Upstream   | I                             |
| rs10197126     | 1.06E-06 | -7.4 (-10.1, -4.6)  | T            | 0.06 | 2   | 29367455  | <i>ALK</i>          | Intronic   | I                             |
| rs13412991     | 1.18E-06 | 4.7 (2.8, 6.7)      | C            | 0.22 | 2   | 134039507 | <i>NCKAP5</i>       | Intronic   | I                             |
| rs978097       | 1.34E-06 | 4.7 (2.8, 6.7)      | A            | 0.22 | 2   | 134044181 | <i>NCKAP5</i>       | Upstream   | I                             |
| chr2:134041755 | 1.42E-06 | 4.7 (2.8, 6.7)      | A            | 0.22 | 2   | 134041755 | <i>AC010974.1</i>   | Downstream | I                             |
| rs1307512      | 1.59E-06 | -5 (-6.9, -3)       | T            | 0.15 | 1   | 91085272  | <i>RP4-665J23.1</i> | Intronic   | G                             |
| rs13000827     | 1.85E-06 | 4.6 (2.7, 6.6)      | C            | 0.24 | 2   | 134058287 | <i>AC010974.1</i>   | Intergenic | I                             |
| rs6587981      | 2.28E-06 | 4.6 (2.7, 6.6)      | G            | 0.24 | 1   | 48878916  | <i>AGBL4</i>        | Intronic   | I                             |
| rs4945933      | 2.29E-06 | -4.1 (-5.7, -2.4)   | G            | 0.24 | 6   | 113646886 | <i>RP1-236J16.1</i> | Upstream   | G                             |
| rs4439062      | 2.45E-06 | 6.5 (3.7, 9.4)      | C            | 0.10 | 7   | 125277824 | <i>AC005276.1</i>   | Intergenic | I                             |
| rs4439063      | 2.45E-06 | 6.5 (3.7, 9.4)      | T            | 0.10 | 7   | 125278107 | <i>AC005276.1</i>   | Intergenic | I                             |
| chr11:31974761 | 3.02E-06 | -7.5 (-10.3, -4.5)  | T            | 0.06 | 11  | 31974761  | <i>RCN1</i>         | Intergenic | I                             |
| rs247617       | 3.15E-06 | 4.3 (2.5, 6.2)      | A            | 0.26 | 16  | 55548217  | <i>CETP</i>         | Intergenic | G                             |
| chr7:148245243 | 3.38E-06 | -14 (-18.7, -8.6)   | A            | 0.01 | 7   | 148245243 | <i>EZH2</i>         | Downstream | I                             |
| rs7549812      | 3.62E-06 | 4.5 (2.6, 6.5)      | T            | 0.24 | 1   | 48876505  | <i>AGBL4</i>        | Intronic   | I                             |
| rs6708174      | 4.01E-06 | 4.6 (2.6, 6.7)      | C            | 0.22 | 2   | 134060713 | <i>AC010974.1</i>   | Intergenic | I                             |
| rs1188926      | 4.14E-06 | -5 (-6.9, -2.9)     | A            | 0.14 | 1   | 91088864  | <i>ZNF644</i>       | Intergenic | I                             |
| chr20:6508845  | 4.38E-06 | -12.8 (-17.3, -7.8) | G            | 0.02 | 20  | 6508845   | <i>BMP2</i>         | Intergenic | I                             |
| rs4793515      | 4.78E-06 | -4 (-5.6, -2.3)     | A            | 0.29 | 17  | 66462101  | <i>AC005181.1</i>   | Intergenic | I                             |
| rs7754776      | 4.83E-06 | 6.4 (3.6, 9.3)      | A            | 0.09 | 6   | 13373877  | <i>PHACTR1</i>      | Intronic   | G                             |

<sup>1</sup>Whether SNP was genotyped (G) or imputed (I)
