# Supplementary material for: Transferability and Fine Mapping of genome-wide associated loci for lipids in African Americans
Source: PubMed Central journal article supplement (PMC3573912; doi:10.1186/1471-2350-13-88), 2012-09-21
Supplement: 1471-2350-13-88-S4.pdf [file 1471-2350-13-88-S4.pdf]

**Additional File 4. Top SNPs for GWAS of LDL**

| SNP            | P-value  | Beta (95% CI)        | Minor Allele | MAF   | Chr | Position  | Nearest Gene | SNP Type   | Detection Method <sup>1</sup> |
|----------------|----------|----------------------|--------------|-------|-----|-----------|--------------|------------|-------------------------------|
| rs711794       | 6.28E-08 | -12.2 (-16.2, -8)    | C            | 0.21  | 2   | 173854697 | ZAK          | Downstream | I                             |
| rs820044       | 6.84E-08 | -11.9 (-15.9, -7.8)  | A            | 0.21  | 2   | 173853469 | ZAK          | Downstream | I                             |
| rs820042       | 6.84E-08 | -11.9 (-15.9, -7.8)  | T            | 0.21  | 2   | 173853723 | ZAK          | Downstream | G                             |
| rs4797274      | 2.63E-07 | -25.8 (-33.9, -16.8) | C            | 0.03  | 18  | 6969102   | LAMA1        | Intronic   | I                             |
| rs73126777     | 5.61E-07 | -33.3 (-43.6, -21.7) | T            | 0.01  | 4   | 31505789  | AC097654.2   | Intergenic | I                             |
| rs10991534     | 5.71E-07 | -21.9 (-29.3, -13.9) | A            | 0.03  | 9   | 106892035 | SLC44A1      | Intergenic | G                             |
| chr18:24285215 | 7.11E-07 | -37.7 (-48.9, -24.6) | G            | 0.01  | 18  | 24285215  | CDH2         | Intergenic | I                             |
| chr5:126615349 | 7.15E-07 | -37.6 (-48.8, -24.6) | G            | 0.01  | 5   | 126615349 | MEGF10       | Upstream   | I                             |
| rs7379343      | 8.19E-07 | -26.3 (-35, -16.7)   | T            | 0.02  | 5   | 84372188  | AC113412.1   | Intergenic | G                             |
| rs6768039      | 1.05E-06 | -26.4 (-35.2, -16.7) | T            | 0.02  | 3   | 27387602  | SLC4A7       | Downstream | I                             |
| chr10:63290442 | 1.18E-06 | -31.9 (-42, -20.3)   | A            | 0.02  | 10  | 63290442  | ARID5B       | Upstream   | I                             |
| rs315677       | 1.39E-06 | 12.5 (7.3, 17.9)     | G            | 0.20  | 4   | 24990879  | ANAPC4       | Intronic   | G                             |
| rs647296       | 1.46E-06 | -23.8 (-32, -14.8)   | A            | 0.03  | 3   | 174641219 | NLGN1        | Intronic   | I                             |
| chr10:63300324 | 1.46E-06 | -35 (-46, -22.3)     | T            | 0.013 | 10  | 63300324  | ARID5B       | Upstream   | I                             |
| chr9:18916807  | 1.47E-06 | -31.9 (-42.2, -20.2) | G            | 0.02  | 9   | 18916807  | FAM154A      | Upstream   | I                             |
| chr16:78351295 | 1.72E-06 | 18.3 (10.6, 26.6)    | C            | 0.08  | 16  | 78351295  | MAF          | Intergenic | I                             |
| rs10830976     | 1.78E-06 | -10.5 (-14.5, -6.4)  | C            | 0.24  | 11  | 92452436  | RPL26P31     | Intergenic | I                             |
| rs41311218     | 2.42E-06 | -23 (-31.1, -14.1)   | G            | 0.03  | 9   | 137850661 | CAMSAP1      | Intronic   | I                             |
| chr11:18991104 | 3.32E-06 | -33.3 (-44.3, -20.7) | A            | 0.01  | 11  | 18991104  | MRGPRX2      | Upstream   | I                             |
| chr11:18991837 | 3.32E-06 | -33.3 (-44.3, -20.7) | A            | 0.01  | 11  | 18991837  | MRGPRX2      | Upstream   | I                             |
| chr11:18993141 | 3.32E-06 | -33.3 (-44.3, -20.7) | T            | 0.01  | 11  | 18993141  | MRGPRX2      | Upstream   | I                             |
| rs16936007     | 3.32E-06 | -33.3 (-44.3, -20.7) | A            | 0.01  | 11  | 18997152  | MRGPRX2      | Upstream   | I                             |
| rs16936009     | 3.32E-06 | -33.3 (-44.3, -20.7) | A            | 0.01  | 11  | 18997970  | MRGPRX2      | Upstream   | I                             |
| chr11:18999650 | 3.32E-06 | -33.3 (-44.3, -20.7) | A            | 0.01  | 11  | 18999650  | MRGPRX2      | Upstream   | I                             |
| chr11:18984380 | 3.47E-06 | -33.3 (-44.2, -20.7) | A            | 0.01  | 11  | 18984380  | MRGPRX2      | Upstream   | I                             |
| chr5:126600724 | 3.71E-06 | -32.4 (-43.2, -20)   | T            | 0.02  | 5   | 126600724 | MEGF10       | Intergenic | I                             |
| chr4:31521821  | 3.98E-06 | -31.7 (-42.3, -19.5) | C            | 0.01  | 4   | 31521821  | AC094654.2   | Intergenic | I                             |
| rs13406521     | 4.05E-06 | -16.5 (-22.7, -9.8)  | T            | 0.07  | 2   | 20980013  | AC012361.1   | Intergenic | G                             |
| rs17116062     | 4.06E-06 | -23.5 (-31.9, -14.2) | T            | 0.03  | 5   | 153754313 | GALNT10      | Intronic   | I                             |
| rs10271961     | 4.40E-06 | -12.9 (-18, -7.6)    | G            | 0.14  | 7   | 56261590  | CCNJPI       | Downstream | I                             |
| rs1383551      | 4.76E-06 | -9 (-12.6, -5.2)     | C            | 0.40  | 15  | 98433423  | ADAMTS17     | Intronic   | I                             |
| rs8180784      | 4.78E-06 | -11.3 (-15.8, -6.7)  | A            | 0.18  | 7   | 56248594  | CCNJPI       | Intergenic | I                             |

<sup>1</sup>Whether SNP was genotyped (G) or imputed (I)
