# Supplementary material for: Transferability and Fine Mapping of genome-wide associated loci for lipids in African Americans
Source: PubMed Central journal article supplement (PMC3573912; doi:10.1186/1471-2350-13-88), 2012-09-21
Supplement: 1471-2350-13-88-S5.pdf [file 1471-2350-13-88-S5.pdf]

### Additional File 5. Top SNPs for GWAS of TG

| SNP            | P-value  | Beta (95% CI)      | Minor Allele | MAF  | Chr | Position  | Nearest Gene         | SNP Type   | Detection Method <sup>1</sup> |
|----------------|----------|--------------------|--------------|------|-----|-----------|----------------------|------------|-------------------------------|
| chr16:50157331 | 5.90E-08 | 63.1 (37, 94)      | G            | 0.02 | 16  | 50157331  | <i>AC084058.6-1</i>  | Intergenic | I                             |
| chr20:56173824 | 3.60E-07 | 36.7 (21.3, 53.8)  | T            | 0.03 | 20  | 56173824  | <i>C20orf85</i>      | Downstream | I                             |
| chr16:50154664 | 3.91E-07 | 46.6 (26.7, 69.6)  | T            | 0.03 | 16  | 50154664  | <i>AC084058.6-1</i>  | Intergenic | I                             |
| chr20:56171067 | 6.03E-07 | 35.2 (20.3, 52)    | T            | 0.03 | 20  | 56171067  | <i>C20orf85</i>      | Downstream | I                             |
| chr20:56171725 | 6.03E-07 | 35.2 (20.3, 52)    | A            | 0.03 | 20  | 56171725  | <i>C20orf85</i>      | Downstream | I                             |
| chr20:56171885 | 6.03E-07 | 35.2 (20.3, 52)    | T            | 0.03 | 20  | 56171885  | <i>C20orf85</i>      | Downstream | I                             |
| chr20:56172094 | 6.03E-07 | 35.2 (20.3, 52)    | C            | 0.03 | 20  | 56172094  | <i>C20orf85</i>      | Downstream | I                             |
| chr20:56173287 | 6.03E-07 | 35.2 (20.3, 52)    | T            | 0.03 | 20  | 56173287  | <i>C20orf85</i>      | Downstream | I                             |
| chr16:2881419  | 1.08E-06 | 76.2 (40.7, 120.4) | A            | 0.01 | 16  | 2881419   | <i>FLYWCH1</i>       | Intronic   | I                             |
| chr16:2904218  | 1.55E-06 | 81.3 (42.7, 130.2) | A            | 0.01 | 16  | 2904218   | <i>FLYWCH1</i>       | Intronic   | I                             |
| rs4750962      | 1.67E-06 | 20.8 (11.9, 30.3)  | A            | 0.10 | 10  | 130166324 | <i>Rp11-264E18.1</i> | Intergenic | I                             |
| chr16:50292828 | 1.69E-06 | 70.6 (37.5, 111.7) | A            | 0.01 | 16  | 50292828  | <i>AC084058.6-1</i>  | Downstream | I                             |
| rs9765940      | 1.81E-06 | 44.1 (24.3, 67.2)  | C            | 0.02 | 6   | 150132817 | <i>PCMT1</i>         | Intronic   | I                             |
| chr16:2900872  | 2.02E-06 | 76.8 (40.2, 122.9) | G            | 0.01 | 16  | 2900872   | <i>FLYWCH1</i>       | Upstream   | I                             |
| chr16:2901743  | 2.02E-06 | 76.8 (40.2, 122.9) | T            | 0.01 | 16  | 2901743   | <i>FLYWCH1</i>       | Upstream   | I                             |
| chr16:2891098  | 2.08E-06 | 64.8 (34.4, 102)   | T            | 0.02 | 16  | 2891098   | <i>FLYWCH1</i>       | Upstream   | I                             |
| chr16:2891329  | 2.08E-06 | 64.8 (34.4, 102)   | C            | 0.02 | 16  | 2891329   | <i>FLYWCH1</i>       | Upstream   | I                             |
| chr16:2904226  | 2.54E-06 | 82.8 (42.6, 134.1) | G            | 0.01 | 16  | 2904226   | <i>FLYWCH1</i>       | Intronic   | I                             |
| chr1:167219749 | 2.87E-06 | 62.7 (33, 98.8)    | G            | 0.01 | 1   | 167219749 | <i>ATP1B1</i>        | Intergenic | I                             |
| chr16:50173931 | 2.89E-06 | 41.9 (22.7, 63.9)  | C            | 0.03 | 16  | 50173931  | <i>AC084058.6-1</i>  | Intergenic | I                             |

<sup>1</sup>Whether SNP was genotyped (G) or imputed (I)
